# Supplementary material for: The Course of Anti-HBc Antibodies over Time in Immunocompromised Hosts
Source: MDPI journal article supplement (doi:10.3390/vaccines10020137), 2022-01-18
Supplement: s1 [file s1]

# **Supplement:**

Table S1: Anti-HBc S/CO values overtime.

|                 | All                | HBsAg positive     | HBsAg negative   |
|-----------------|--------------------|--------------------|------------------|
| <b>Baseline</b> | 8.71 (5.52-10.92)  | 10.87 (8.96-12.24) | 7.53 (3.94-9.82) |
| <b>Year 1</b>   | 8.85 (5.65-11.085) | 11.25 (9.88-12.36) | 7.41 (3.87-9.64) |
| <b>Year 2</b>   | 9.21 (6.02-11.24)  | 11.53 (10.3-13.11) | 7.9 (4.23-9.92)  |
| <b>Year 3</b>   | 8.67 (5.4-10.39)   | 11.03 (9.68-12.03) | 7.69 (4.12-9.69) |
| <b>Year 4</b>   | 8.53 (5.405-10.36) | 10.94 (9.82-11.79) | 7.49 (4.02-9.56) |
| <b>Year 5</b>   | 8.89 (5.715-10.65) | 10.95 (9.41-12.09) | 7.53 (4.08-9.9)  |
| <b>Year 6</b>   | 8.335 (5.25-10.04) | 10.74 (9.18-12.41) | 7.24 (3.8-9.32)  |
| <b>Year 7</b>   | 7.87 (4.55-9.525)  | 10.21 (8.54-11.06) | 7.1 (3.5-9.03)   |
| <b>Year 8</b>   | 7.575 (4.28-9.165) | 9.47 (8.3-10.64)   | 7.01 (3.56-8.84) |
| <b>Year 9</b>   | 7.2 (4.21-8.7)     | 9.01 (7.6-10.05)   | 6.81 (3.71-8.34) |
| <b>Year 10</b>  | 7.65 (4.425-9.315) | 8.74 (7.89-10.16)  | 7.1 (3.75-9.1)   |
| <b>Year 11</b>  | 6.79 (3.63-7.92)   | 8.26 (7.53-9.42)   | 6.1 (3.11-7.66)  |
| <b>Year 12</b>  | 6.695 (3.42-8.26)  | 8.42 (7.6-9.2)     | 6.3 (2.8-7.63)   |
| <b>Year 13</b>  | 7.59 (3.955-8.875) | 9.29 (7.59-10.11)  | 7.34 (3.59-8.8)  |

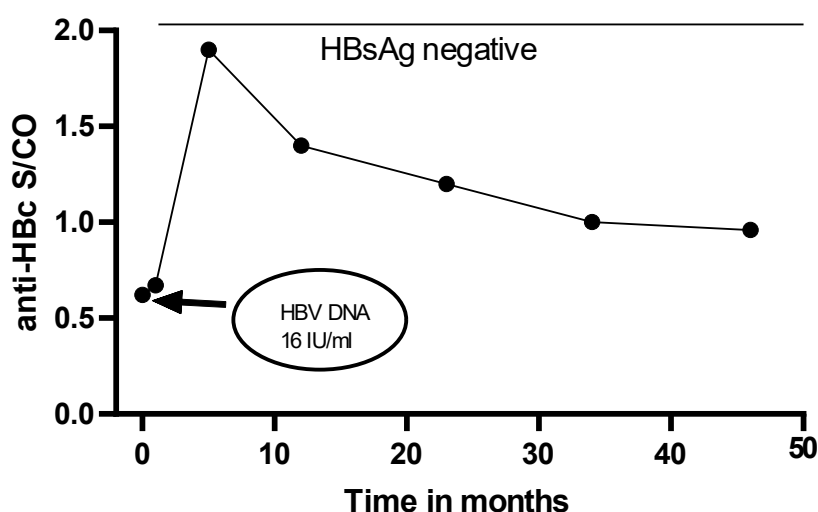

Figure S1: Anti-HBc (S/CO) levels in the patient with id 9 over time.
